# Supplementary material for: pH-Responsive hyperbranched polypeptides based on Schiff bases as drug carriers for reducing toxicity of chemotherapy
Source: Royal Society of Chemistry journal article supplement (doi:10.1039/d0ra01241f), 2020-01-01
Supplement: d0ra01241f1.pdf [file d0ra01241f1.pdf]

## Supplementary Information

### pH-Responsive Polypeptides nanoparticles based on Schiff base for efficient drug encapsulation and cancer therapy

Rui Yan<sup>1</sup>, Xinyi Liu<sup>1</sup>, Junjie Xiong, Qiyi Feng, Junhuai Xu, Haibo Wang\*, Kai Xiao\*

West China Hospital; College of Biomass Science and Engineering, Sichuan University, Chengdu, 610065, China.

Correspondence E-mail whb6985@scu.edu.cn; xiaokaikaixiao@scu.edu.cn

<sup>1</sup>R. Yan and X. Liu contributed equally to this work.

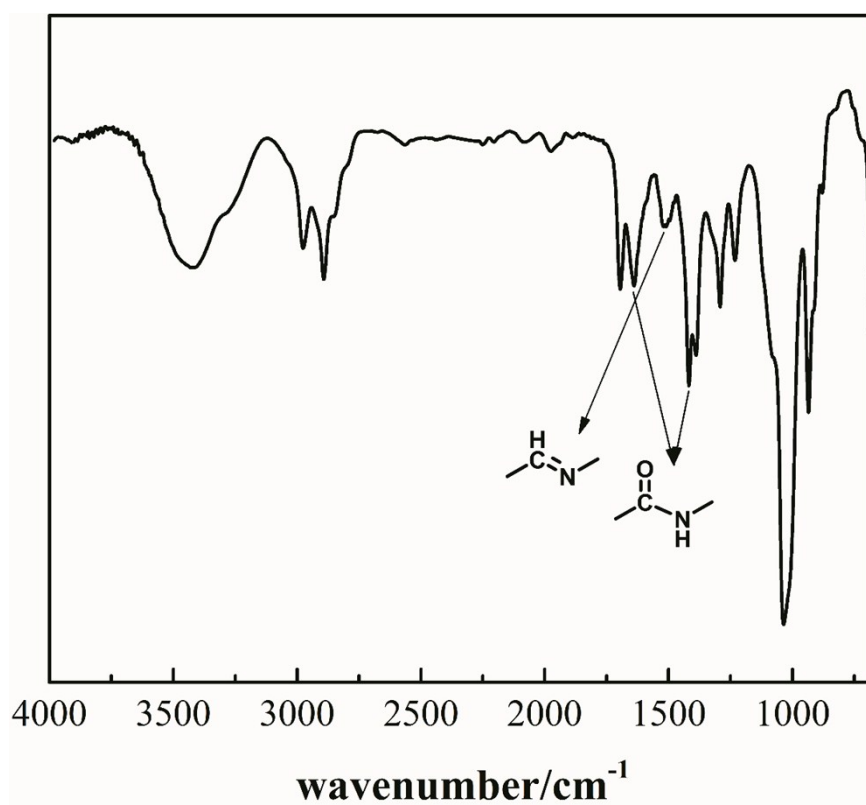

Figure S1. FT-IR spectra of MPEG-PEI-PBLL

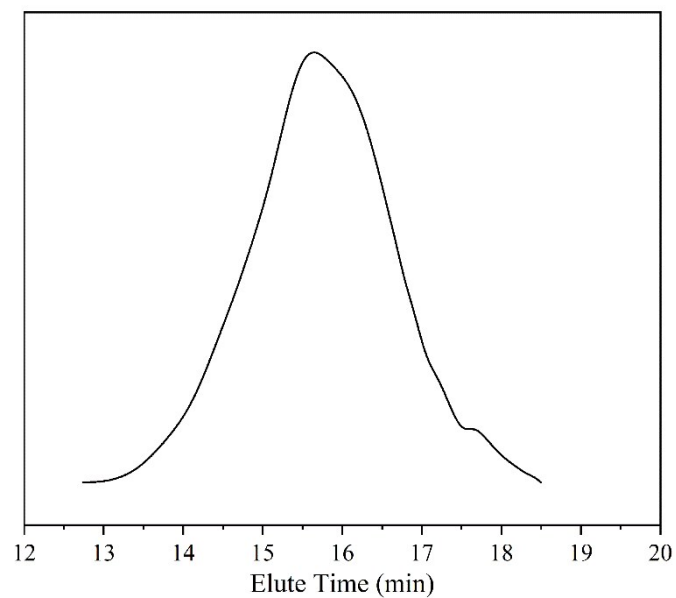

**Figure S2.** GPC profiles of MPEG-PEI-PBLL (Elution: DMF, PS standards).

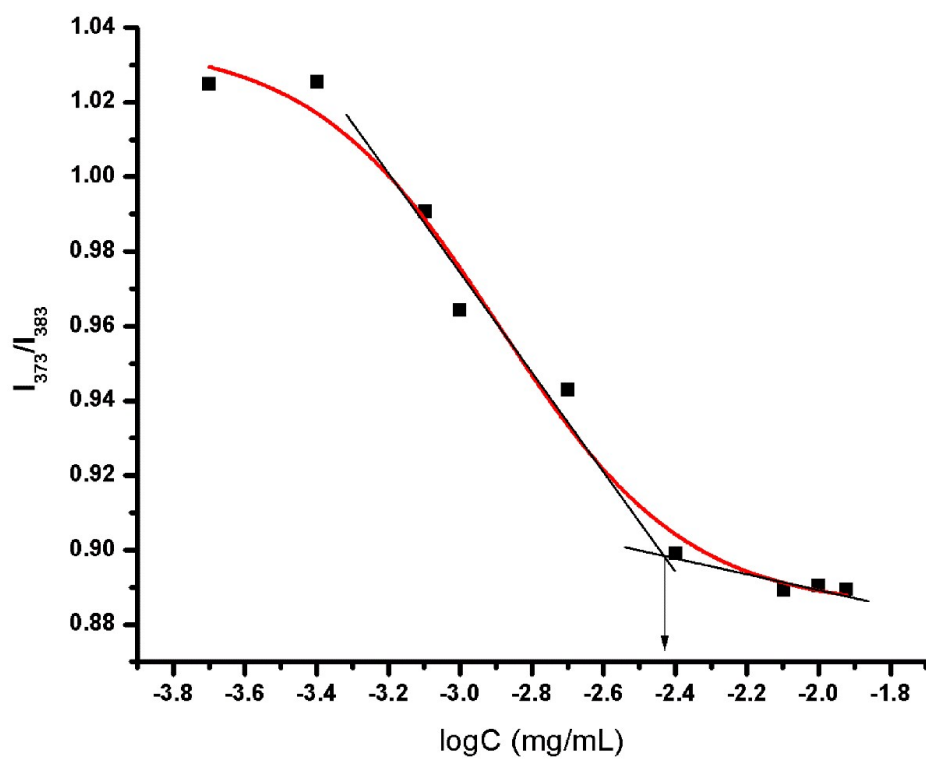

**Figure S3.** Critical micelle concentration (CMC) of the MPEG-PEI-PBLL micelles

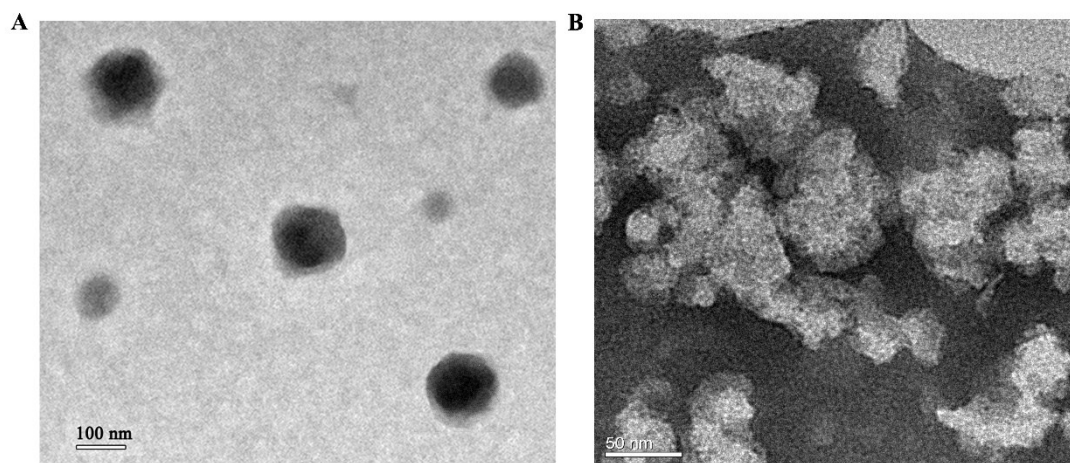

**Figure S4.** TEM images of (A) DOX-loaded micelles and (B) blank micelles incubated in PBS at pH 5.0 after 48 h.

**Table S1** Pharmacokinetic parameters of BALB/c female mice after intravenous administration of DOX and the DOX-loaded micelles at doses of 10 mg DOX/kg (n = 3).

| Parameters                          | Free DOX           | DOX-loaded micelles  |
|-------------------------------------|--------------------|----------------------|
| AUC <sub>0-24</sub> ( $\mu$ g/mL*h) | 4.51 $\pm$ 0.67    | 19.53 $\pm$ 1.72     |
| CL (mL/h/kg)                        | 255.96 $\pm$ 70.51 | 1212.33 $\pm$ 468.00 |
| C <sub>max</sub> (mg/L)             | 2.08 $\pm$ 0.91    | 12.12 $\pm$ 3.02     |

AUC: area under the time concentration curve; CL: clearance; C<sub>max</sub>: peak concentration

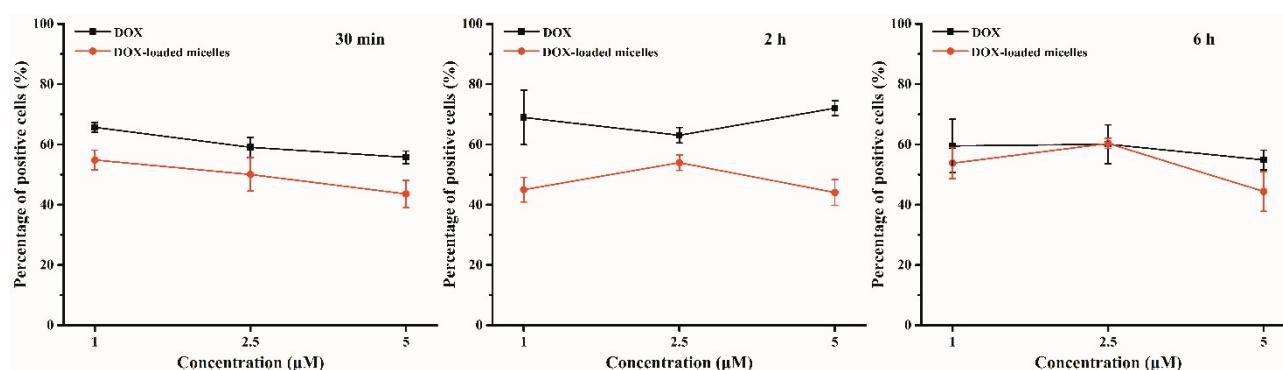

**Figure S5** the percentage of positive cells after incubated with DOX and DOX-loaded micelles in different concentration and time
